# Supplementary material for: Bacterial production of polyhydroxyalkanoates (PHAs) using various waste carbon sources
Source: PeerJ. 2024 Oct 24;12:e17936. doi: 10.7717/peerj.17936 (PMC11512797; doi:10.7717/peerj.17936)
Supplement: Supplemental Information 1 — Data was recorded during initial investigation and research. [file peerj-12-17936-s001.xlsx]

## Sheet: Sheet1
Bacterial strains	Incubation time	Rice Bran %
	(h)	0.5			1			1.5			2			2.5
		CDM (g/L)	PHA (g/L)	PHA %	CDM (g/L)	PHA (g/L)	PHA %	CDM (g/L)	PHA (g/L)	PHA %	CDM (g/L)	PHA (g/L)	PHA	CDM (g/L)	PHA (g/L)	PHA
													%			%
B. Subtilis	24	3.8	1.7	44.7	11	1.4	12.7	5.5	1.9	12.3	11.2	1	8.9	9.3	1.4	15
	48	2.9	2	69	7	0.5	7.1	3.2	1.1	8.3	11.9	1.1	9.2	14.7	1.3	8.8
	72	2.6	0.7	26.9	2.5	0.002	8	6.4	1.6	9.7	11.4	0.5	4.4	10	0.5	5
	96	1.6	0.5	31.3	11.9	0.8	6.7	3.7	1.2	8.8	11.1	0.9	8.1	12.8	0.8	6.3
B. cereus	24	4.5	1.6	35.5	6.3	1.3	20.6	8.7	1	11.5	10.1	1	9.9	5.6	0.6	10.7
	48	6.7	0.6	8.9	4.8	1.1	23	9.3	0.7	7.5	13	0.9	6.9	8.9	1.2	13.5
	72	7.6	0.4	5.2	9.8	0.8	8.2	4.6	0.8	5.5	19.8	2.1	10.6	8.5	1.5	17.7
	96	4.6	1.1	23.9	11	2.2	20	11.5	2.2	19.1	16.6	2.5	15	11.4	1.6	14
Alcaligenes	24	2	0.9	45	3.8	1.3	34.2	6.4	1.5	23.4	7	1.1	15.7	4.9	1.6	32.6
	48	2.4	1.7	70.8	3.7	1.7	45.9	4.8	3.3	68.7	6.4	2	31.2	6.5	2.1	32.3
	72	3.1	2.7	87.1	5	3.2	64	6.4	3	46.8	14.5	3.3	22.7	7.3	3.4	46.5
	96	2.6	0.3	11.5	4.1	0.8	19.5	6	0.2	3.3	8.9	1	11.2	8.6	1	11.6
	120	3.3	0.4	12.1	6.5	0.7	10.8	9.8	0.9	9.2	10	0.9	9	10.6	1.8	16.9
P. aeruginosa	24	2.9	1	34.4	2.6	1.1	42.3	5.1	1.2	23.5	5.3	1.1	20.7	6.9	1.1	15.9
	48	2.5	1.9	76	3.9	2.9	74.3	4.3	1.7	39.5	5.4	1	18.5	15.5	2.9	18.7
	72	3.2	3	93.7	5.2	2.6	50	4.6	3.8	82.6	21.7	3.4	15.6	10	3	30
	96	1.9	0.5	26.3	3.7	0.6	16.2	3.9	0.8	20.5	9.1	1.1	12	6.7	0.7	10.4
	120	2.7	0.5	18.5	6.1	0.6	9.8	7.3	0.1	1.4	7.9	0.5	6.3	8.7	0.8	9.2

## Sheet: Sheet2
Bacterial strains	Incubation time	Sugarcane molasses %
	(h)	2			4			6			8			10
		CDM (g/L)	PHA (g/L)	PHA %	CDM (g/L)	PHA (g/L)	PHA %	CDM (g/L)	PHA (g/L)	PHA %	CDM (g/L)	PHA (g/L)	PHA %	CDM (g/L)	PHA	PHA %
															(g/L)
B. Subtilis	24	12	1.1	91.6	0.3	0.1	33.3	1.5	0.9	60	1	0.2	20	0.3	0.2	66.6
	48	0.7	0.2	28.5	0.8	0.4	50	0.5	0.1	20	0.4	0.1	25	0.5	0.3	60
	72	0.6	0.1	16.6	0.7	0.1	14.2	0.4	0.2	50	1.1	0.5	45.4	0.3	0.1	33.3
	96	0.2	0.1	50	0.6	0.1	16.6	0.7	0.3	42.8	1.1	0.6	54.5	0.7	0.2	28.5
B. cereus	24	1.5	1.2	80	0.8	0.4	50	0.6	0.1	16.6	0.9	0.3	33.3	0.3	0.2	66
	48	1.1	0.8	72.7	0.8	0.6	75	0.9	0.5	55.5	0.2	0.1	50	0.5	0.2	40
	72	0.8	0.5	62.5	1.1	0.4	36.3	1.3	0.7	53.8	0.3	0.2	66.6	0.8	0.4	50
	96	0.7	0.4	57.1	0.5	0.1	20	0.5	0.2	40	0.4	0.1	25	0.5	0.2	40
Alcaligenes	24	1.7	1.3	76.4	1.9	1.2	63.1	1.7	1.1	64.7	10.5	1.3	12.3	2.1	0.5	23.8
	48	2	1	50	3	2.1	70	2.2	1.6	72.7	2	1.1	55	1.5	0.9	60
	72	1.2	0.2	16.6	1.5	1	66.6	1.3	0.7	53.8	1.8	1.4	77.7	2.2	0.4	18.1
	96	1.1	0.7	63.6	0.7	0.4	57.1	2.1	1.5	71.4	1.1	1	90.9	1.1	0.4	36.3
P. aeruginosa	24	1	0.5	50	0.8	0.5	62.5	0.6	0.1	16.6	1.7	0.6	35.2	2	0.4	20
	48	0.7	0.4	57.1	1.4	1.1	78.5	1.4	1	71.4	2.5	1	40	1.6	0.5	31.2
	72	2.3	2.1	91.3	3.6	2.5	69.4	4	1.6	40	4.8	2.8	58.3	4.3	3.3	76.7
	96	2	1.9	95	3.5	2.3	65.7	3.7	1.7	45.9	4.8	3	62.5	5.9	4.3	72.8
